## Correction: *MMP-3* gene polymorphisms are associated with increased risk of osteoarthritis in Chinese men

Wen Guo<sup>1,4,\*</sup>, Pengcheng Xu<sup>6,\*</sup>, Tianbo Jin<sup>2,3</sup>, Jihong Wang<sup>4</sup>, Dongsheng Fan<sup>4</sup>, Zengtao Hao<sup>4</sup>, Yuntao Ji<sup>4</sup>, Shangfei Jing<sup>4</sup>, Chaoqian Han<sup>4</sup>, Jieli Du<sup>7</sup>, Dong Jiang<sup>1</sup>, Shuzheng Wen<sup>4</sup> and Jianzhong Wang<sup>5</sup>

<sup>1</sup> Inner Mongolia Medical University, Hohhot, Inner Mongolia, China

<sup>2</sup> National Engineering Research Center for Miniaturized Detection Systems, School of Life Sciences, Northwest University, Xi'an, Shaanxi, China

<sup>3</sup> Xi'an Tiangen Precision Medical Institute, Xi'an, Shaanxi, China

<sup>4</sup> Department of Hand and Foot Surgery, Second Affiliated Hospital, Inner Mongolia Medical University, Hohhot, Inner Mongolia Autonomous Region, China

<sup>5</sup> Department of Trauma, Second Affiliated Hospital, Inner Mongolia Medical University, Hohhot, Inner Mongolia Autonomous Region, China

<sup>6</sup> Department of Hand Surgery, Hebei province Cangzhou Hospital of integrated Traditional and Western Medicine, Cangzhou, Hebei, China

<sup>7</sup> Cangzhou People's Hospital, Cangzhou, Hebei, China

\* These authors have contributed equally to this work

**Published:** April 13, 2018

**Copyright:** Guo et al. This is an open-access article distributed under the terms of the Creative Commons Attribution License 3.0 (CC BY 3.0), which permits unrestricted use, distribution, and reproduction in any medium, provided the original author and source are credited.

**This article has been corrected:** The correct author affiliations are given below:

<sup>1</sup> Inner Mongolia Medical University, Hohhot, Inner Mongolia, China

<sup>2</sup> National Engineering Research Center for Miniaturized Detection Systems, School of Life Sciences, Northwest University, Xi'an, Shaanxi, China

<sup>3</sup> Xi'an Tiangen Precision Medical Institute, Xi'an, Shaanxi, China

<sup>4</sup> Department of Hand and Foot Surgery, Second Affiliated Hospital, Inner Mongolia Medical University, Hohhot, Inner Mongolia Autonomous Region, China

<sup>5</sup> Department of Trauma, Second Affiliated Hospital, Inner Mongolia Medical University, Hohhot, Inner Mongolia Autonomous Region, China

<sup>6</sup> Department of Hand Surgery, Hebei province Cangzhou Hospital of integrated Traditional and Western Medicine, Cangzhou, Hebei, China

<sup>7</sup> Cangzhou People's Hospital, Cangzhou, Hebei, China

\* These authors have contributed equally to this work

Original article: Oncotarget. 2017; 8:79491-79497. <https://doi.org/10.18632/oncotarget.18493>
